# Supplementary material for: Coverage of antenatal iron-folic acid and calcium distribution during pregnancy and their contextual determinants in the northeastern region of India
Source: PubMed Central journal article supplement (PMC9339897; doi:10.3389/fnut.2022.894245), 2022-07-18
Supplement: Data_Sheet_4.pdf [file Data_Sheet_4.pdf]

Supplementary Table 2. Anemia and pre-eclampsia burden in pregnant women from the states of northeast India, 2018–19 to 2020–21.

| <b>Region State</b>    | <b>Anemia during pregnancy<sup>†</sup></b> | <b>Pre-eclampsia<sup>‡</sup></b> |
|------------------------|--------------------------------------------|----------------------------------|
| India (national level) | 52.2                                       | 28.7                             |
| Northeastern states    |                                            |                                  |
| Arunachal Pradesh      | 27.9                                       | 38.7                             |
| Assam                  | 54.2                                       | 29.6                             |
| Manipur                | 32.4                                       | 29.0                             |
| Meghalaya              | 45.0                                       | 42.2                             |
| Mizoram                | 34.0                                       | 49.2                             |
| Nagaland               | 22.2                                       | 34.3                             |
| Sikkim                 | 40.7                                       | 41.0                             |
| Tripura                | 61.5                                       | 49.4                             |

<sup>†</sup> The anaemia during pregnancy estimates refer to the prevalence of anaemia (defined as hemoglobin concentration < 11.0 g/dL) detected in pregnant women aged 15–49 years during the National Family Health Survey (NFHS-5) in the 2019–20 period [1]. These estimates are expressed in percentage.

<sup>‡</sup> Reliable state-wise estimates of pre-eclampsia prevalence in India are unavailable. The estimates provided in this table are based upon recently published reports on self-reported prevalence of symptoms suggestive of pre-eclampsia during pregnancy among women aged 15–49 years [2,3]. These estimates are expressed per 100 live births.

### References:

1. International Institute for Population Sciences (IIPS) and ICF. National Family Health Survey (NFHS-5), India, 2019-21. Mumbai: IIPS (2021).
2. Malik A, Jee B, Gupta SK. Preeclampsia: disease biology and burden, its management strategies with reference to India. *Pregnancy Hypertens.* (2019) 15:23-31. doi:10.1016/j.preghy.2018.10.011.
3. Agrawal S, Walia GK. Prevalence and risk factors for symptoms suggestive of pre-eclampsia in Indian women. *J Womens Health Issue Care.* (2014) 3:6. doi: 10.4172/2325-9795.1000169.
